# Supplementary material
Source: PubMed Central journal article supplement (PMC4111731)

## **Supplemental Material to:**

**Karine Lapouge, Remo Perozzo, Justyna Iwaszkiewicz,  
Claire Bertelli, Vincent Zoete, Olivier Michielin,  
Leonardo Scapozza, Dieter Haas**

**RNA pentaloop structures as effective targets of  
regulators belonging to the RsmA/CsrA protein family**

**2013; 10(6)**

**<http://dx.doi.org/10.4161/rna.24771>**

**[www.landesbioscience.com/journals/rnabiology/article/24771/](http://www.landesbioscience.com/journals/rnabiology/article/24771/)**

**SUPPLEMENTARY DATA:****Supplementary Table S1.** Theoretical binding free energies ( $\Delta G$ )  $\pm$ SD for complex formation between RsmE and four RNA oligomers<sup>a</sup>

| Gene                   | RNA loop sequence <sup>b</sup> | $\Delta G_1$<br>(kcal/mol) | $\Delta G_2$<br>(kcal/mol) |
|------------------------|--------------------------------|----------------------------|----------------------------|
| <i>hcnA</i>            | ACGGAU                         | -87.2 $\pm$ 13.6           | -69.3 $\pm$ 14.5           |
| <i>hcnA</i> $\Delta$ U | ACGGA-                         | -70.4 $\pm$ 11.6           | -60.7 $\pm$ 11.7           |
| <i>pltA</i>            | AGGGA-                         | -81.5 $\pm$ 13.8           | -66.7 $\pm$ 10.2           |
| <i>pltA</i> +U         | AGGGAU                         | -91.2 $\pm$ 14.0           | -85.2 $\pm$ 12.2           |

<sup>a</sup> The  $\Delta G$  values were obtained by the MM-GBSA method as described in Materials and Methods and are averaged over four molecular dynamic trajectories. The RNA oligomers having higher ( $\Delta G_1$ ) and lower ( $\Delta G_2$ ) affinities for RsmE were treated separately.

<sup>b</sup> -: no nucleotide.

**Supplementary Table S2.** Oligonucleotides used in this study

| Oligonucleotides | Sequence (5'→3')                  |
|------------------|-----------------------------------|
| 6628             | CCCATTCAATTTTTCGCGGATGAACCCAGCATG |
| 6628rev          | CTGGGTTTCATCCGCGAAAAATGAATGGGGTAC |
| 9512             | CCCATTCAATTTTTCACGGAGAACCCAGCATG  |
| 9512rev          | CTGGGTTCTCCGTGAAAAATGAATGGGGTAC   |
| 9524             | CCCAGTGCGCCTAACAGGGAGTGGGGCATG    |
| 9524rev          | CCCCACTCCCTGTTAGGCGCACTGGGGTAC    |
| 9525             | CCCAGTGCGCCTAACAGGGATGTGGGGCATG   |
| 9525rev          | CCCCACATCCCTGTTAGGCGCACTGGGGTAC   |
| 9536             | CTTCTGAAAAGAATGGAATCAAGAGGAGCATG  |
| 9536rev          | CTCCTCTTGATTCCATTCTTTTCAGAAGGTAC  |
| 9537             | CTTCTGAAAAGAATGGATCAAGAGGAGCATG   |
| 9537rev          | CTCCTCTTGATCCATTCTTTTCAGAAGGTAC   |
| 10001            | CCCATTCAATTTTTCAGGGAGAACCCAGCATG  |
| 10001rev         | CTGGGTTCTGGGTGAAAAATGAATGGGGTAC   |
| 10002            | CCCATTCAATTTTTCAGGAAGAACCCAGCATG  |
| 10002rev         | CTGGGTTCTTCCTGAAAAATGAATGGGGTAC   |
| 10101            | CCCAGTGCGCCTAACAAGGAGTGGGGCATG    |
| 10101rev         | CCCCACTCCTTGTTAGGCGCACTGGGGTAC    |
| 10102            | CCCATTCAATTTTTCGCGGACGAACCCAGCATG |
| 10102rev         | CTGGGTTTCGTCCGCGAAAAATGAATGGGGTAC |

**Supplementary Figure S1.** RsmE cross-linking experiments. 12% sodium dodecyl sulfate polyacrylamide gel electrophoresis of RsmE cross-linking experiment: glutaraldehyde performed as described in ref 52. Lane 1 : RsmE (monomer) lanes 2 and 3 : different concentrations of RsmE treated with glutaraldehyde ladder: molecular weight markers.

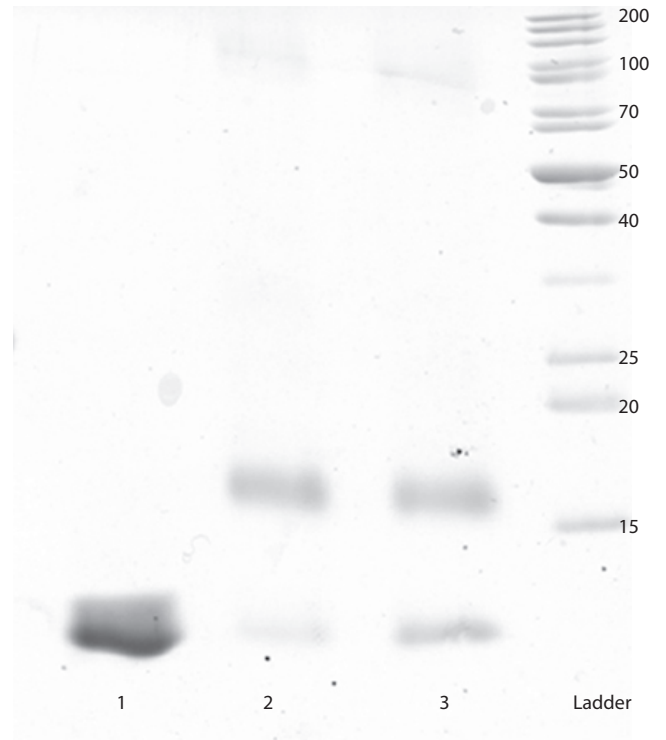

**Supplementary Figure S2.** Correlation between mean computed  $\Delta G$  values (Table 3) and experimentally obtained  $\Delta G$  values (Table 2). The theoretical values were averaged over all trajectories; values for distinct RNA chains were treated separately and divided into groups of lower and higher  $\Delta G$  observed per system. The assumption was made that the lower values represent the  $\Delta G$  of the first RNA chain bound to the protein, and the higher  $\Delta G$  values represent the second chain. Panel A shows the correlation between the lower theoretical  $\Delta G$  values and the experimental  $\Delta G_1$  values; panel B shows the correlation between the higher theoretical  $\Delta G$  values and the experimental  $\Delta G_2$  values. Purple star – *hcnA*; blue cross – *hcnA\Delta U*; green cross – *pltA*; blue square – *pltA+U*.

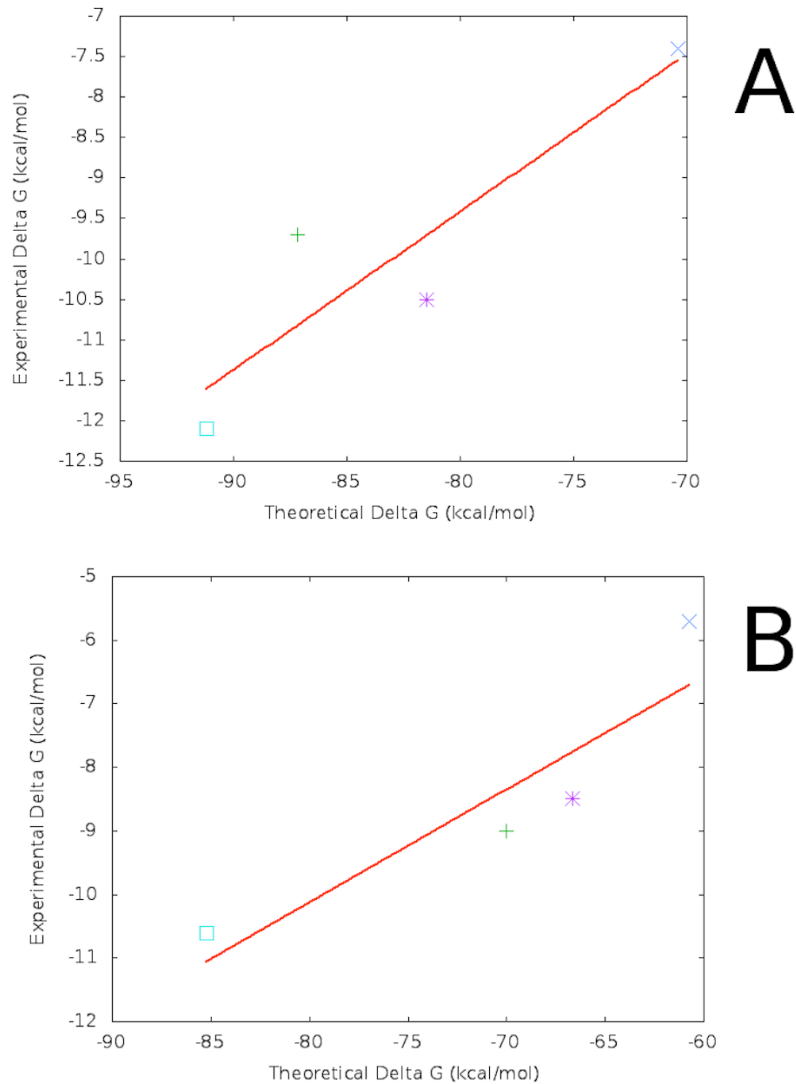

Supplement: rna-10-1030-s01.pdf [file rna-10-1030-s01.pdf]
